# Supplementary material
Source: Springer Nature journal article supplement (https://www.springermedizin.de/resource/supplementary/13034_2013_232_MOESM1_ESM.pdf/9652600)

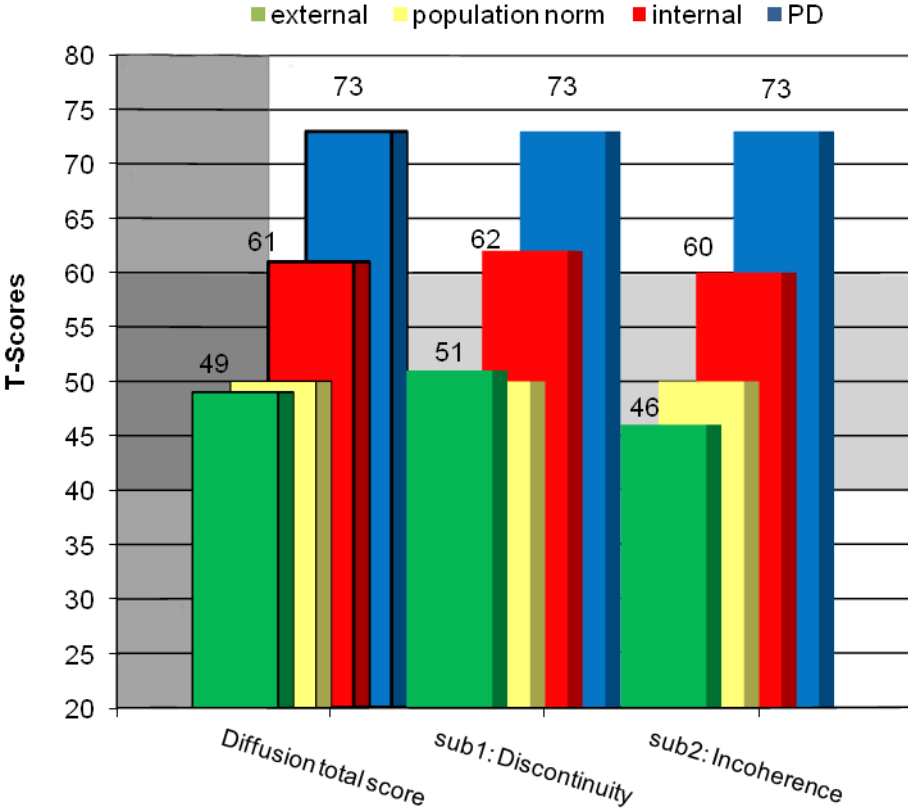

Supplement: MOESM1 [file 9652600]
